1 ***Bmmp* influences wing shape by regulating anterior-posterior and**  
2 **proximal-distal axis development**

3

4 Yunlong Zou<sup>1¶</sup>, Xin Ding<sup>1¶</sup>, Li Zhang<sup>1</sup>, Lifeng Xu<sup>1</sup>, Shubo Liang<sup>1</sup>, Hai Hu<sup>1</sup>, Fangyin<sup>1</sup>  
5 Dai<sup>1</sup>, Xiaoling Tong<sup>1\*</sup>

6

7 1, State Key Laboratory of Silkworm Genome Biology; Key Laboratory of Sericultural  
8 Biology and Genetic Breeding, Ministry of Agriculture and Rural Affairs; College of  
9 Sericulture, Textile and Biomass Sciences; Southwest University, Chongqing, P. R.

10 China

11

12 ¶These authors contributed equally to this work.

13

14 \*Corresponding author

15 E-mail: [xltong@swu.edu.cn](mailto:xltong@swu.edu.cn) (XT)

16 Telephone: +86-23-68250551

17

18 **Running title:** *Bmmp* influences wing shape development

19

20

21 **Abbreviations:** A-P, anterior-posterior; cDNA, complementary DNA;  
22 CRISPR/Cas9, clustered regularly interspaced short palindromic repeats/CRISPR-  
23 associated protein-9 nuclease; D-V, dorsal-ventral; *mp*, *micropterosus*; P-D, proximal-  
24 distal; qRT-PCR, quantitative real-time PCR; SNP, single nucleotide polymorphism;  
25 SSR, simple sequence repeat; WT, wildtype.

26

## 27 **Abstract**

28 Insect wings are subject to strong selective pressure, resulting in the evolution of  
29 remarkably diverse wing shapes that largely determine flight capacity. However, the  
30 genetic basis and regulatory mechanisms underlying wing shape development are not  
31 well understood. The silkworm *Bombyx mori micropterosus* (*mp*) mutant exhibits  
32 shortened wing length and enlarged vein spacings, albeit without changes in total wing  
33 area. Thus, the *mp* mutant comprises a valuable genetic resource for studying wing  
34 shape development. In this study, we used molecular mapping to identify the gene  
35 responsible for the *mp* phenotype and designated it *Bmmp*. Phenotype-causing  
36 mutations were identified as indels and single nucleotide polymorphisms in non-coding  
37 regions. These mutations resulted in decreased *Bmmp* mRNA levels and changes in  
38 transcript isoform composition. *Bmmp* null mutants were generated by CRISPR/Cas9  
39 and exhibited significantly smaller wings. By examining the expression of genes critical  
40 to wing development in wildtype and *Bmmp* null mutants, we found that *Bmmp* exerts  
41 its function by coordinately modulating anterior-posterior and proximal-distal axis  
42 development. We also studied a *Drosophila mp* mutant and found that *Bmmp* is

43 functionally conserved in *Drosophila*. The *Drosophila mp* mutant strain exhibits curly  
44 wings of reduced size and a complete loss of flight capacity. Our results increase our  
45 understanding of the mechanisms underpinning insect wing development and reveal  
46 potential targets for pest control.

47 **Keywords:** *Bmmp*; wing shape; silkworm; CRISPR/Cas9

48

49

50

51

52

53

54

55

56

57

58

59

60

61

62

63

64

## 65 **Introduction**

66 Wings endow insects with tremendous adaptive advantages because they enhance  
67 survival and fitness by making it possible to change environments rapidly. Insect wings  
68 are constantly subject to adaptive evolution and exhibit remarkable diversity in shape.  
69 Changes in wing shape result in differences in flight capacity, leading to variations in  
70 insect lifestyle [1, 2]. For example, dimorphism in wing shape occurs in a wide range  
71 in insects, such as rice planthoppers [3, 4] and aphids [5]. Long-winged morphs can fly,  
72 which allows them to escape adverse habitats and track changing resources, whereas  
73 short-winged morphs are flightless, but usually possess higher fecundity [1, 2]. In the  
74 order Lepidoptera, wing shapes are distinctly different between migratory species and  
75 non-migratory species. Typically, migratory moths and butterflies have relatively  
76 narrower forewings with straighter costal margins compared to those of non-migratory  
77 species [6].

78 Coordinated regulation of anterior-posterior (A-P) and proximal-distal (P-D) wing  
79 axis development plays a crucial role in correct wing shape formation. During this  
80 process, wing patterning and proliferation are coordinately modulated by relay signals  
81 [7]. For A-P axis development, posterior compartment identity is specified by the  
82 *engrailed* gene, which then activates the expression of *hedgehog* [7]. The secreted  
83 Hedgehog protein traverses the A-P border and induces expression of *Dpp* and *Wnt1* in  
84 anterior cells close to the border [8]. During the process of wing P-D axis development,  
85 *apterous* is expressed in the dorsal compartment and activates Notch signaling, which  
86 in turn induces *Wnt1* activity at the dorsal-ventral (D-V) border [9, 10]. *Wnt1* helps

87 establish the P-D axis of the wing by activating the *Distal-less* gene, which specifies  
88 the most distal regions of the wing [11, 12]. Reduced levels of Dpp affect both the width  
89 and length of the resulting wing and significantly decrease total wing area [13].  
90 Moderate and uniform amounts of exogenous Wnt1 stimulate proliferative wing growth,  
91 leading to enlargement of the prospective wing [14].

92 The identification of new factors that influence wing shape will expand our  
93 understanding of the genetic basis of wing diversity. We hypothesized that as-yet  
94 uncharacterized key regulators coordinately regulate both A-P and P-D axis signals  
95 during wing development. To examine this developmental process more closely, we  
96 used the silkworm *Bombyx mori* (Lepidoptera, Bombycidae) *micropterous* (*mp*) mutant,  
97 which exhibits shortened wing length and enlarged vein spacings. We identified the  
98 gene responsible for the *mp* phenotype and designated it *Bmmp*. We found mutations in  
99 the noncoding regions of *Bmmp* that result in decreased *Bmmp* mRNA levels and  
100 changes in transcript isoform composition. In addition, we generated a *Bmmp* null  
101 mutant and determined that *Bmmp* exerts its effect on wing shape by regulating wing  
102 A-P and P-D axis development.

103

## 104 **Results**

105

### 106 **Characterization of the silkworm *micropterous* (*mp*) mutant** 107 **wing phenotype**

108 To characterize the wing phenotype of the silkworm *mp* mutant, we compared

109 pupae and moth wing phenotypes of *mp* and *Dazao* wildtype (WT) silkworms. Whereas  
110 the wings of WT pupae fully cover the third abdominal segment, the wings of *mp* pupae  
111 only cover the second abdominal segment, leaving the third abdominal segment naked  
112 (**Fig 1A**). Further examination demonstrated that the wing length of *mp* moths was  
113 significantly shorter than that of WT moths within each sex, although there was not a  
114 significant difference in total wing area (**Fig 1B, 1C, 1D**). In addition, there was  
115 significantly greater spacing between adjacent longitudinal veins in the wings of *mp*  
116 moths compared to those of WT moths within each sex (**Fig 1E**). These results  
117 demonstrate that the *mp* phenotype is not associated with a specific gender. To reflect  
118 the overall changes in wing morphology, we divided the wing length by the sum of  
119 longitudinal veins spacings. The resulting value is significantly smaller for *mp* moths  
120 than for WT moths within each sex (**Fig 1F**).

121

## 122 **Molecular mapping and analysis of candidate genes** 123 **responsible for the *mp* phenotype**

124 To identify candidate gene(s) responsible for the *mp* phenotype, we performed a  
125 genetic linkage analysis using *B. mori* simple sequence repeat (SSR) markers and newly  
126 designed markers polymorphic between WT and *mp* silkworms. Initially, we roughly  
127 mapped the *mp* phenotype using 456 BC<sub>1</sub>M individuals and SSR markers on the  
128 eleventh linkage group. The results indicate that the gene responsible for the *mp*  
129 phenotype is located within a 12.1-cM region linked to SSR marker S1146 (**Fig 2A and**  
130 **2B**). Subsequent fine mapping with 320 BC<sub>1</sub>M and newly designed primer sets

131 narrowed the *mp* locus to an approximately 260-kb region between markers 2810A and  
132 2810C on the nscaf2810 scaffold. The 2810M marker was tightly linked with the *mp*  
133 locus (**Fig 2C**). Two candidate genes (*KWMTBOMO06923* and *KWMTBOMO06924*)  
134 were identified within the 260 kb region, based on annotated sequences obtained from  
135 the SilkBase database [15] (**Fig 2D**).

136 Because the functions of *KWMTBOMO06923* and *KWMTBOMO06924* are  
137 uncharacterized, we searched for mutations responsible for the *mp* phenotype by  
138 comparing the corresponding genomic sequences from *mp* silkworms and silkworms  
139 with normal wings. Although synonymous single nucleotide polymorphisms (SNPs)  
140 mutations were identified in the *mp* *KWMTBOMO06923* and *KWMTBOMO06924*  
141 genes, no mutations that changed the sequences of the predicted translated proteins  
142 were found. We next surveyed all introns within *KWMTBOMO06924*, as well as  
143 putative regulatory regions 2 kb upstream and downstream from the gene. A total of 59  
144 indels and 101 SNPs specific to the *mp* mutant were identified. (**Table S1 and Table**  
145 **S2**).

146 Multiple transcript isoforms of *KWMTBOMO06924* are annotated in the *B. mori*  
147 EST database (<http://sgp.dna.affrc.go.jp/KAIKObase/>). To obtain more detailed  
148 isoform information, we generated and sequenced *KWMTBOMO06924* cDNA libraries.  
149 Sequence alignments revealed that the *KWMTBOMO06924* gene is comprised of 10  
150 exons, spanning 36.79 kb of genomic DNA. A total of 28 *KWMTBOMO06924*  
151 transcript isoforms were identified in WT wing discs. The full-length cDNA sequence  
152 contained a 1443-bp open reading frame encoding 481 amino acids, consistent with the

153 cDNA clone (fwd-02K11) retrieved from the *B. mori* EST database. The protein  
154 encoded by the full-length transcript isoform contains three functional domains (BTB,  
155 BACK and TLDC) as determined using the SMART online prediction tool. We next  
156 examined *KWMTBOMO06924* transcript isoform composition and expression in wing  
157 discs from *mp* and WT silkworms. Of the 28 transcript isoforms detected in the WT  
158 strain, only 6 were recovered in the *mp* mutant. In addition, one unique transcript was  
159 identified in the *mp* silkworms (**Fig 3**). An intact BTB domain, encoded by exons 1-3,  
160 was present in all transcript isoforms identified in both silkworm strains. Quantitative  
161 RT-PCR analysis of wing discs from silkworms at the initiation of the wandering stage  
162 revealed that total *KWMTBOMO06924* mRNA levels were significantly lower in *mp*  
163 vs. WT silkworms during this critical period of wing development (**Fig 4**).

164 Together, these results suggest that *KWMTBOMO06924* is responsible for the *mp*  
165 phenotype, with causative mutations localized to regulatory regions. Thus, we  
166 designated this gene *Bmmp*. The results are consistent with two possible causes for the  
167 *mp* phenotype: (1) decreased total *Bmmp* mRNA levels, and (2) reduced variation of  
168 *Bmmp* transcript isoforms.

169

## 170 **Null mutation of *Bmmp* results in a significant reduction in** 171 **wing size**

172 To elucidate the function of the *Bmmp* gene in wing development and morphology,  
173 we utilized the CRISPR/Cas9 system to disrupt *Bmmp*. We selected four genomic  
174 targets spanning 130 bp in exon 1 to generate large fragment deletions (**Fig 5A**). Since



175 this region is shared across isoforms, any frame-shift mutations would be predicted to  
176 abolish all functional transcripts. sgRNAs were synthesized *in vitro* for the genomic  
177 targets, mixed with Cas9 protein, and injected into the preblastoderm of *Dazao* embryos.  
178 In total, 110 injected embryos hatched, and 81 individuals survived to an adult stage.  
179 Out of these 81 silkworms, 67 exhibited markedly smaller wings in pupal and adult  
180 stages, compared to uninjected WT controls (**Fig 5B and 5C**). To confirm that the  
181 *Bmmp* deletions caused the decrease in wing size, genomic DNA was extracted from  
182 three moths with small wings. Regions spanning the four sgRNA targets were amplified  
183 by PCR, subcloned, and sequenced. As expected, the three selected moths contained  
184 *Bmmp* deletions and no wildtype sequences (**Fig S1**). Notably, five distinct mutations  
185 were identified in moth #11 (**Fig S1**), demonstrating the presence of mosaicism in  
186 silkworms of the injected generation (generation 0, G<sub>0</sub>).

187 To further confirm the function of *Bmmp* in a uniform genetic background,  
188 homozygous or compound mutant silkworms were obtained by crossing mosaic  
189 knockouts. We randomly surveyed 3 egg batches of generation 1 (G<sub>1</sub>). All individuals  
190 surveyed were homozygous or compound mutants (**Fig 5D**), demonstrating that  
191 germline transmission of the mutations was highly efficient. Compared with the WT  
192 control, homozygous or compound mutant silkworms all exhibited significantly smaller  
193 wings (**Fig 5E and 5F**), consistent with the phenotype observed in G<sub>0</sub> mosaics.

194 It is noteworthy that we obtained homozygous knockout silkworms with an in-  
195 frame 108 bp deletion in the coding region of exon 1 by crossing G<sub>1</sub>-mp-24 ♀ with G<sub>1</sub>-  
196 mp-15 ♂ (**Fig 5D**). Presumably this mutation disrupts the functional BTB domain

197 without affecting the downstream BACK and TLDC domains (**Fig 5D**). However, these  
198 knockout silkworms were identical in wing phenotype to silkworms harboring  
199 frameshift mutations that presumably cause premature termination and functional loss  
200 of all three domains. These results suggest that the BTB domain plays an indispensable  
201 role in *Bmmp* gene function.

202 Taken together, we conclude that *Bmmp* plays an important role in wing  
203 development and the regulation of wing shape. Loss of function of *Bmmp* results in  
204 significantly smaller wings. In addition, we found that the BTB domain is indispensable  
205 for *Bmmp* function. We next sought to identify the mechanism(s) by which *Bmmp*  
206 regulates wing morphology.

207

## 208 ***Bmmp* regulates genes responsible for wing A-P and P-D axis** 209 **development**

210 The decreased wing size of *Bmmp* biallelic knockout silkworms reflects decreases  
211 in wing width and length along the anterior-posterior (A-P) and proximal-distal (P-D)  
212 axes, respectively. To detect potential interactions between *Bmmp* and other genes  
213 involved in wing formation, we used qRT-PCR to investigate the expression of key  
214 genes responsible for wing A-P and P-D axis development in wing discs from  
215 wandering stage *Bmmp* knockout silkworms. mRNA levels were significantly  
216 decreased in *Bmmp* knockout homozygous and compound heterozygous silkworms for  
217 *engrailed*, *hedgehog*, *dpp*, and *gbb*, which are responsible for wing A-P axis  
218 development (**Fig 6**). Likewise, mRNA levels in knockouts were reduced for *apterous*

219 *A*, *apterous B*, *vestigial*, *Wingless (wnt1)*, and *distal-less*, which participate in wing P-  
220 D axis development (**Fig 6**). These results suggest that *Bmmp* directs wing morphology  
221 by regulating genes responsible for wing A-P and P-D axis development.

222

## 223 ***Bmmp* gene function is conserved between silkworms and** 224 ***Drosophila***

225 The orthologous *Bmmp* gene in *Drosophila* is *CG7102*. Downregulation of this  
226 gene protects *Drosophila* from hypoxic tissue injury [16]. However, the functional role  
227 for *CG7102* in *Drosophila* wing development is not known. To examine whether the  
228 function of these two genes is conserved, we first predicted the functional domains of  
229 the *CG7102* protein product using the SMART online tool. Like *Bmmp*, *CG7102* is  
230 predicted to encode BTB, BACK, and TLDC domains. We obtained a *Drosophila mp*  
231 mutant strain that contains an insertion-associated gene mutation in *CG7102* from the  
232 Bloomington *Drosophila* Stock Center. Compared to the *Drosophila yw* control, the  
233 wings of the *Drosophila mp* mutant are curly and significantly smaller in total wing  
234 area, although the size difference between the *Drosophila* strains is not as severe as for  
235 *Bmmp* knockout and WT silkworms (**Fig 7A and 7B**). We speculate the milder  
236 phenotype may be due to genetic differences as the *Drosophila mp* mutant contains an  
237 intronic transposon insertion in the *CG7102* gene, whereas the silkworm *Bmmp*  
238 knockouts we generated disrupt exon 1. Our tests show that the *Drosophila mp* mutant  
239 suffers a complete loss of flight capacity (**Video S1**), while flight is normal in the WT  
240 control (*yw*).

241

## 242 **Discussion**

243       The silkworm *mp* mutant exhibits shortened wing length and enlarged spacing of  
244 adjacent longitudinal veins without a decrease in total wing area. In this study, we  
245 identified the gene responsible for the *mp* phenotype and designated it *Bmmp*. Two  
246 possible causes for the *mp* phenotype are (1) a significant decrease in total *Bmmp*  
247 mRNA levels, and (2) the reduced diversity of *Bmmp* transcript isoforms in the wing  
248 discs. The changes in *Bmmp* expression in the silkworm *mp* mutant are likely to be  
249 caused by one or more mutations dispersed in non-coding regions of this gene. However,  
250 additional experiments would be required to dissect the effects of each of the non-  
251 coding mutations. In contrast, frameshift mutations induced by CRISPR/Cas9  
252 mutagenesis into the constitutive exon 1 coding region of *Bmmp* resulted in  
253 significantly decreased wing length, width, and total wing area.

254       Alternative splicing is a ubiquitous regulatory mechanism of gene expression in  
255 eukaryotic organisms. For example, 90% to 95% of human genes are estimated to  
256 undergo alternative splicing [17, 18]. Variable mRNA transcript isoforms are translated  
257 into different protein isoforms with diverse functions and/or localizations [19]. In our  
258 study, we detected 28 distinct *Bmmp* transcript isoforms in wing discs of WT silkworms.  
259 Our findings suggest that *Bmmp* exerts its effect on wing development, at least in part,  
260 by exploiting diversified transcript isoforms, which give rise to different protein  
261 products with varying combinations of functional domains. *Bmmp* proteins can be  
262 categorized into three classes, namely, BTB-BACK-TLDC containing proteins, BTB-

263 BACK containing proteins, and BTB-only proteins. Our results provide insight into the  
264 function of the BTB domain. A homozygous knockout silkworm harboring a 108-bp  
265 deletion that only disrupts the BTB domain exhibited the same wing phenotype as  
266 knockouts harboring frameshift mutations that presumably cause loss of function for  
267 all three domains. These results suggest the BTB domain is essential and indispensable  
268 for the function of the Bmmp protein. However, further investigation is needed to fully  
269 understand the functions of the BTB, BACK, and TLDC domains.

270 Pest migration, which depends on strong flight performance, is one of the most  
271 significant causes of damage to crops and forests [20]. Wing shape has a significant  
272 impact on the flight capacity of insects [1, 2]. Therefore, key genes regulating wing  
273 shape development are potential targets for pest control [21, 22]. In this study, we  
274 demonstrated that the *mp* orthologous gene *CG7102* is functionally conserved in  
275 *Drosophila*. Furthermore, we found flight capacity is completely lost in the *Drosophila*  
276 *mp* mutant, in which *CG7102* contains a transposon insertion. Since mutations  
277 responsible for the *mp* phenotype compromise flight ability, it may be possible to  
278 exploit them in future pest control strategies. For example, if mutants can be released  
279 to cross into and reduce the fitness of target populations, the use of broad-spectrum  
280 pesticides could be reduced or avoided.

281 Finally, we demonstrated that null mutations of *Bmmp* decreased mRNA levels for  
282 genes involved in wing A-P axis development, including *engrailed*, *hedgehog*, *Dpp*,  
283 and *Gbb*, as well as genes involved in P-D axis development, including *apterous A*,  
284 *apterous B*, *vestigial*, *Wnt1*, and *Distal-less*. These results indicate that the *Bmmp* gene

285 influences wing shape and size by regulating A-P and P-D axis development.

286 In summary, our results deepen our understanding of wing development in insects  
287 and provide a foundation for the development of insect pest control strategies.

288

## 289 **Materials and Methods**

### 290 **Silkworm and *Drosophila* strains**

291 Silkworm *Dazao* (wildtype) and *mp* mutant strains were obtained from the  
292 Silkworm Gene Bank at Southwest University (Chongqing, China). Silkworms were  
293 reared on fresh mulberry leaves at 25°C.

294 A *Drosophila melanogaster mp* mutant was purchased from the Bloomington  
295 *Drosophila* Stock Center (Stock Number: 80643). *Drosophila melanogaster* strain *yw*,  
296 with the same genetic background as the *Drosophila mp* mutant, was obtained from  
297 SIBCB *Drosophila* Library (Shanghai, China) and used as wildtype control in all  
298 *Drosophila* experiments. *Drosophila* strains were maintained at 25°C with standard  
299 corn meal medium.

300

### 301 **Wing morphological measurements**

302 Wings were dissected from silkworms (*Dazao*, *mp* mutant, *Bmmp* knockout  
303 mutant) and *Drosophila* (*yw*, *mp* mutant). Wings were imaged using a Leica DVM6  
304 digital microscope. Wing shape parameters (wing area, wing length, adjacent vein  
305 spacings) were measured on 30 male and 30 female WT and *mp* silkworm moths, 23  
306 female WT and 45 female *Bmmp* knockouts, and 16 male *yw* and 13 male *mp*

307 *Drosophila* using ImageJ [23]. Experiments were independently repeated three times.

308

## 309 **Positional cloning and molecular mapping**

310 *Dazao* and *mp* silkworms served as parental strains to produce F<sub>1</sub> progeny. Due to  
311 the lack of recombination in female silkworms, 20 progeny from a single-pair backcross  
312 between an F<sub>1</sub> female and a *mp* male (BC<sub>1</sub>F) were used for the linkage analysis and 456  
313 progeny from *mp* female × F<sub>1</sub> male backcrosses (BC<sub>1</sub>M) were used for the  
314 recombination analysis. Developing embryos were incubated at 25°C in a humidified  
315 atmosphere.

316 We performed preliminary mapping using published SSR markers [24, 25]. SSR  
317 markers on chromosome 11 that were polymorphic between the parental strains were  
318 used for linkage and recombination analyses. Linkage analysis was conducted with  
319 JOINMAP 4.0 using Kosambi's mapping function [26]. SSR markers were used as  
320 anchor points to develop novel markers based on the silkworm genome sequence  
321 (International Silkworm Genome Consortium, 2008) for fine mapping with 320 BC<sub>1</sub>M.

322

## 323 **Identification of *mp*-specific SNPs and indels**

324 Silkworm *mp* mutants were analyzed by whole genome sequencing according to a  
325 previously published protocol [27]. To identify *mp*-specific mutations, data were  
326 compared to sequences from 127 domestic and wild silkworm strains with normal wing  
327 phenotypes from SilkBase [15] and a previous report [27]. Alignments to reference  
328 sequences (released in November 2016 by SilkBase [15]) were performed to identify

329 SNPs and indels in the *mp* mutant and the 127 silkworm strains, respectively. SNPs and  
330 indels were extracted from genomic sequences surrounding *KWMTBOMO06923* and  
331 *KWMTBOMO06924* in the *mp* strain and the 127 silkworm strains, and then screened  
332 for variations specific to *mp* mutants using an online Venn diagram tool  
333 (<http://bioinformatics.psb.ugent.be/webtools/Venn/>).

334

### 335 **Examination of *Bmmp* transcript isoforms**

336 To generate *Bmmp* cDNA libraries, total RNA was extracted from wing discs of  
337 *mp* and WT silkworms. For each strain, wing disc samples were obtained from  
338 silkworms from fifth-instar larvae on days 3, 5, and 7 (5L3D, 5L5D, and 5L7D) and  
339 from wandering stage silkworms at 0, 24, and 48 hours (W 0 h, W 24 h, and W 48 h).  
340 RNA extractions were performed using the MicroElute Total RNA Kit (OMEGA), and  
341 reverse transcription was performed using the PrimeScript RT Reagent Kit (Takara).  
342 Equal masses (concentration times volume) of the resulting cDNAs from different  
343 developmental stages were mixed and used as the templates for PCR amplification. The  
344 PCR primers were F: 5'-AACTAACTTATTTGAGGTTATG-3', and R: 5'-  
345 AATAATCATCGGACTAAATCACCTT-3'. PCR products were subcloned into  
346 pEASY-blunt-zero vectors (TransGen) and sequenced.

347

### 348 **Quantitative RT-PCR (qRT-PCR)**

349 Total RNA was extracted from wing discs of individual silkworms at the wandering  
350 stage using the MicroElute Total RNA Kit (OMEGA) and reverse transcription was



351 performed using the PrimeScript RT reagent Kit (Takara). qRT-PCR experiments were  
352 performed using Hieff SYBR Green Master Mix (YEASEN), according to the  
353 manufacturer's recommended procedure. Silkworms were sampled as follows: N=5 or  
354 6 for *Dazao* and N=10 for *Bmmp* knockouts at 24 h of the wandering stage; N=5 or 6  
355 for *Dazao* and N=5 or 8 for *Bmmp* knockouts at 48 h of the wandering stage. Three  
356 independent replicates were performed for all qRT-PCR experiments. Primer sets are  
357 listed in **Table S3**. Eukaryotic translation initiation factor 4A (silkworm microarray  
358 probe ID sw22934) was used as the internal control.

359

### 360 ***Bmmp* knockout generation**

361 sgRNAs for CRISPR/Cas9 mutagenesis were designed using the CHOP-CHOP  
362 online utility (<http://chopchop.cbu.uib.no/>). sgRNA target sites are shown in Figure 4A.  
363 The DNA template for the T7 promoter used to drive *in vitro* transcription was  
364 constructed by PCR as described [28]. Briefly, an oligonucleotide containing the T7  
365 promoter and the sgRNA target sequence (N<sub>20</sub>) was designed as a forward primer with  
366 the sequence 5'-TAATACGACTCACTATAGG(N<sub>20</sub>)GTTTTAGAGCTAGAAATAGC.  
367 The T7 promoter sequence is underlined. The reverse primer was 5'-  
368 AAAAGCACCGACTCGGTGCCACTTTTTCAAGTTGATAACGGACTAGCCTTA  
369 TTTAACTTGCTATTTCTAGCTCTAAAAC-3'. sgRNA synthesis was performed  
370 using a T7 RiboMax Large Scale RNA Production System (Promega) following the  
371 manufacturer's instructions.

372 The bivoltine silkworm strain *Dazao* was used to generate *Bmmp* knockout

373 silkworms. To generate non-diapaused eggs, silkworm eggs were incubated at 15°C  
374 until hatching, and the larvae were reared on fresh mulberry leaves at 25°C until  
375 wandering stage. Adult moths then oviposited non-diapaused eggs, which were used  
376 for microinjection. A mixture of sgRNA and Cas9 protein (Thermo Fisher) was  
377 incubated at room temperature for 15 min and microinjected into preblastoderm  
378 embryos within 5 h of oviposition. Injected embryos were incubated at 25°C and 80%  
379 humidity for approximately 10 days until hatching. Larvae were maintained at 25°C  
380 and fed fresh mulberry leaves.

381

## 382 **Identification of *Bmmp* knockout silkworm genotypes**

383 Genomic DNA was extracted from the wings of *Bmmp* knockout silkworms at the adult  
384 stage using the TIANamp Genomic DNA Kit (TIANGEN). The DNA was used as a  
385 PCR template to amplify regions spanning the genomic targets. Two primer sets were  
386 used as follows. F1: 5'-TCGGAGCCGTCTTTAAGTGT-3' and R1: 5'-  
387 CAGAAGATGGTTAAGATGACGTT-3', and F2: 5'-  
388 GGTTGCGTTGGTGGTGTAAAT-3' and R2: 5'-TTATCCTGCCAGCTGAGAG-3'.  
389 PCR products were subcloned into pEASY-blunt-zero vectors (TransGen), and  
390 sequenced.

391

## 392 **Statistical analysis**

393 All values are presented as means  $\pm$  SEM or means  $\pm$  SD, as indicated in figure  
394 legends. Student's t test was used to determine p values.

395

## 396 **Acknowledgments**

397 We wish to thank our group members for their continuous support.

398

## 399 **Funding**

400 This work was supported by the National Natural Science Foundation of China (awards  
401 U20A2058 and 31830094).

402

## 403 **Competing interests**

404 The authors have declared that no competing interests exist.

405

406 **Data Availability Statement:** All relevant data are within the manuscript  
407 and its Supporting Information files.

408

## 409 **References**

- 410 1. Zhao Z, Zera AJ. Differential lipid biosynthesis underlies a tradeoff between reproduction and flight  
411 capability in a wing-polymorphic cricket. *Proc Natl Acad Sci U S A*. 2002;99(26):16829-34. Epub  
412 2002/12/18. doi: 10.1073/pnas.262533999. PubMed PMID: 12486227; PubMed Central PMCID:  
413 PMCPMC139229.
- 414 2. Zera AJ, Denno RF. Physiology and ecology of dispersal polymorphism in insects. *Annu Rev*  
415 *Entomol*. 1997;42:207-30. Epub 1997/01/01. doi: 10.1146/annurev.ento.42.1.207. PubMed PMID:  
416 15012313.

- 417 3. Xu HJ, Xue J, Lu B, Zhang XC, Zhuo JC, He SF, et al. Two insulin receptors determine alternative  
418 wing morphs in planthoppers. *Nature*. 2015;519(7544):464-7. Epub 2015/03/25. doi:  
419 10.1038/nature14286. PubMed PMID: 25799997.
- 420 4. Liu F, Li X, Zhao M, Guo M, Han K, Dong X, et al. Ultrabithorax is a key regulator for the  
421 dimorphism of wings, a main cause for the outbreak of planthoppers in rice. *National Science Review*.  
422 2020;7(7):1181-9. doi: 10.1093/nsr/nwaa061. PubMed PMID: WOS:000572865000015.
- 423 5. Shang F, Niu J, Ding BY, Zhang W, Wei DD, Wei D, et al. The miR-9b microRNA mediates  
424 dimorphism and development of wing in aphids. *Proc Natl Acad Sci U S A*. 2020;117(15):8404-9. Epub  
425 2020/03/29. doi: 10.1073/pnas.1919204117. PubMed PMID: 32217736; PubMed Central PMCID:  
426 PMC7165449.
- 427 6. Yao Q, Zhang T. Analysis of wing-shape characteristics of migratory lepidopterous insects. *Insect*  
428 *Science*. 2001;8(2):183-92.
- 429 7. Morata G. How *Drosophila* appendages develop. *Nat Rev Mol Cell Biol*. 2001;2(2):89-97.
- 430 8. Basler K, Struhl G. Compartment boundaries and the control of *Drosophila* limb pattern by  
431 hedgehog protein. *Nature*. 1994;368(6468):208-14.
- 432 9. Diaz-Benjumea FJ, Cohen SM. Interaction between dorsal and ventral cells in the imaginal disc  
433 directs wing development in *Drosophila*. *Cell*. 1993;75(4):741-52.
- 434 10. Blair SS. Mechanisms of compartment formation: evidence that non-proliferating cells do not play  
435 a critical role in defining the D/V lineage restriction in the developing wing of *Drosophila*. *Development*.  
436 1993;119(2):339-51.
- 437 11. Neumann CJ, Cohen SM. Long-range action of Wingless organizes the dorsal-ventral axis of the  
438 *Drosophila* wing. *Development*. 1997;124(4):871-80.

- 439 12. Tabata T, Takei Y. Morphogens, their identification and regulation. *Development*. 2004;131(4):703-  
440 12.
- 441 13. Barrio L, Milán M. Boundary Dpp promotes growth of medial and lateral regions of the *Drosophila*  
442 wing. *Elife*. 2017;6. Epub 2017/07/05. doi: 10.7554/eLife.22013. PubMed PMID: 28675372; PubMed  
443 Central PMCID: PMC5560857.
- 444 14. Baena-Lopez LA, Franch-Marro X, Vincent JP. Wingless promotes proliferative growth in a  
445 gradient-independent manner. *Sci Signal*. 2009;2(91):ra60. Epub 2009/10/08. doi:  
446 10.1126/scisignal.2000360. PubMed PMID: 19809090; PubMed Central PMCID: PMC3000546.
- 447 15. Kawamoto M, Jouraku A, Toyoda A, Yokoi K, Minakuchi Y, Katsuma S, et al. High-quality genome  
448 assembly of the silkworm, *Bombyx mori*. *Insect Biochem Mol Biol*. 2019;107:53-62. doi: doi:  
449 10.1016/j.ibmb.2019.02.002.
- 450 16. Zhou D, Xue J, Chen J, Morcillo P, Lambert JD, White KP, et al. Experimental selection for  
451 *Drosophila* survival in extremely low O<sub>2</sub> environment. *PLoS One*. 2007;2(5):e490. Epub 2007/05/31.  
452 doi: 10.1371/journal.pone.0000490. PubMed PMID: 17534440; PubMed Central PMCID:  
453 PMC1871610.
- 454 17. Pan Q, Shai O, Lee LJ, Frey BJ, Blencowe BJ. Deep surveying of alternative splicing complexity  
455 in the human transcriptome by high-throughput sequencing. *Nat Genet*. 2008;40(12):1413-5. Epub  
456 2008/11/04. doi: 10.1038/ng.259. PubMed PMID: 18978789.
- 457 18. Wang ET, Sandberg R, Luo S, Khrebtkova I, Zhang L, Mayr C, et al. Alternative isoform  
458 regulation in human tissue transcriptomes. *Nature*. 2008;456(7221):470-6. Epub 2008/11/04. doi:  
459 10.1038/nature07509. PubMed PMID: 18978772; PubMed Central PMCID: PMC2593745.
- 460 19. Baralle FE, Giudice J. Alternative splicing as a regulator of development and tissue identity. *Nat*

- 461 Rev Mol Cell Biol. 2017;18(7):437-51. Epub 2017/05/11. doi: 10.1038/nrm.2017.27. PubMed PMID:  
462 28488700; PubMed Central PMCID: PMC6839889.
- 463 20. Ge S, He L, He W, Yan R, Wyckhuys KAG, Wu K. Laboratory-based flight performance of the fall  
464 armyworm, *Spodoptera frugiperda*. J Integr Agric. 2021;20(3):707-14. doi: 10.1016/s2095-  
465 3119(20)63166-5. PubMed PMID: WOS:000618967600008.
- 466 21. Ray RP, Nakata T, Henningsson P, Bomphrey RJ. Enhanced flight performance by genetic  
467 manipulation of wing shape in *Drosophila*. Nat Commun. 2016;7:10851. Epub 2016/03/02. doi:  
468 10.1038/ncomms10851. PubMed PMID: 26926954; PubMed Central PMCID: PMC64773512.
- 469 22. Fu G, Lees RS, Nimmo D, Aw D, Jin L, Gray P, et al. Female-specific flightless phenotype for  
470 mosquito control. Proc Natl Acad Sci U S A. 2010;107(10):4550-4. Epub 2010/02/24. doi:  
471 10.1073/pnas.1000251107. PubMed PMID: 20176967; PubMed Central PMCID: PMC2826341.
- 472 23. Schneider CA, Rasband WS, Eliceiri KW. NIH Image to ImageJ: 25 years of image analysis. Nat  
473 Methods. 2012;9(7):671-5. Epub 2012/08/30. doi: 10.1038/nmeth.2089. PubMed PMID: 22930834;  
474 PubMed Central PMCID: PMC35554542.
- 475 24. Zhan S, Huang J, Guo Q, Zhao Y, Li W, Miao X, et al. An integrated genetic linkage map for  
476 silkworms with three parental combinations and its application to the mapping of single genes and QTL.  
477 BMC genomics. 2009;10:389. doi: 10.1186/1471-2164-10-389. PubMed PMID: 19698097; PubMed  
478 Central PMCID: PMC2741490.
- 479 25. Miao XX, Xub SJ, Li MH, Li MW, Huang JH, Dai FY, et al. Simple sequence repeat-based  
480 consensus linkage map of *Bombyx mori*. Proceedings of the National Academy of Sciences of the United  
481 States of America. 2005;102(45):16303-8. doi: 10.1073/pnas.0507794102. PubMed PMID: 16263926;  
482 PubMed Central PMCID: PMC1283447.

- 483 26. Kosambi D. The estimation of map distances from recombination values. *Ann Eugen.* 1994;12:172–  
484 5.
- 485 27. Xiang H, Liu X, Li M, Zhu Y, Wang L, Cui Y, et al. The evolutionary road from wild moth to  
486 domestic silkworm. *Nat Ecol Evol.* 2018;2(8):1268-79. Epub 2018/07/04. doi: 10.1038/s41559-018-  
487 0593-4. PubMed PMID: 29967484.
- 488 28. Varshney GK, Pei W, LaFave MC, Idol J, Xu L, Gallardo V, et al. High-throughput gene targeting  
489 and phenotyping in zebrafish using CRISPR/Cas9. *Genome Res.* 2015;25(7):1030-42. Epub 2015/06/07.  
490 doi: 10.1101/gr.186379.114. PubMed PMID: 26048245; PubMed Central PMCID: PMC4484386.
- 491

492

493

494

495

496

497

498

499

500

501

502

503

504

505

506

507

508

509

510

511

512

513

514

515

516

517

518

519

520

521

522

523

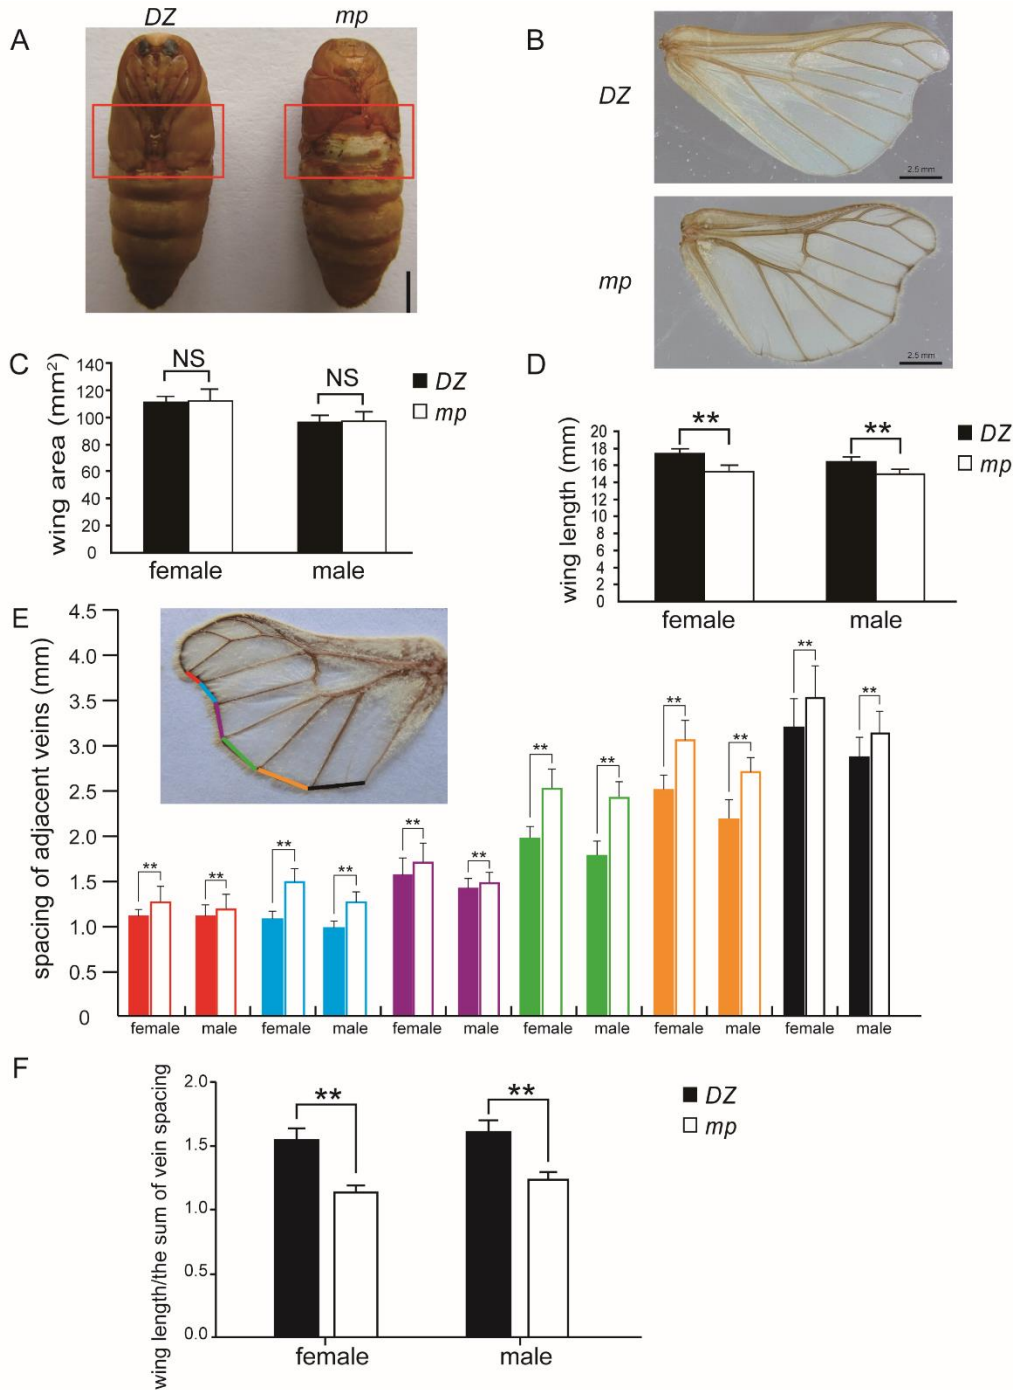

524 **Figure 1. Characterization of wing phenotypes of silkworm *mp* mutant**

525 (A) Representative photograph of male WT (left) and *mp* (right) silkworm pupae.

526 Compared to WT pupae, *mp* pupae exhibit a naked third abdominal segment in the

527 pupal stage, suggestive of a modified wing phenotype. The phenotypically variable



528 region is highlighted within the red rectangular frame. Female *mp* silkworms exhibit  
529 the same phenotype. Scale bar, 5 mm. (B) Representative photograph of female WT  
530 (top) and *mp* (bottom) silkworm moth wings showing the differences in shape. Male  
531 *mp* silkworms exhibited identical phenotypes. Note that scale hairs were removed from  
532 the wing to exhibit wing shape characteristics more clearly. Scale bar, 2.5 mm. (C-F)  
533 Wings of both male and female WT and *mp* silkworm moths were measured using  
534 ImageJ following imaging with a digital microscope. (C) Within each sex, total wing  
535 area of WT and *mp* moths do not differ significantly. (D) Wing length was significantly  
536 shorter in *mp* moths compared to WT moths. (E) The spacings between adjacent  
537 longitudinal veins were significantly larger in *mp* moths compared to WT moths. Filled  
538 columns, WT; unfilled columns, *mp*. Column colors correspond to specific vein  
539 spacings indicated by lines of the same color overlaid on the photographed wing. (F)  
540 Wing length was divided by the sum of spacings between longitudinal veins to reflect  
541 overall wing shape. The resulting values were significantly different between *mp* and  
542 WT moths. N = 30 for both male and female *mp* and *Dazao* silkworm moths. \*\*, P <  
543 0.01; NS, not significant. *DZ*, *Dazao*, used as wildtype control; *mp*, silkworm *mp*  
544 mutant. Error bars represent SD.

545

546

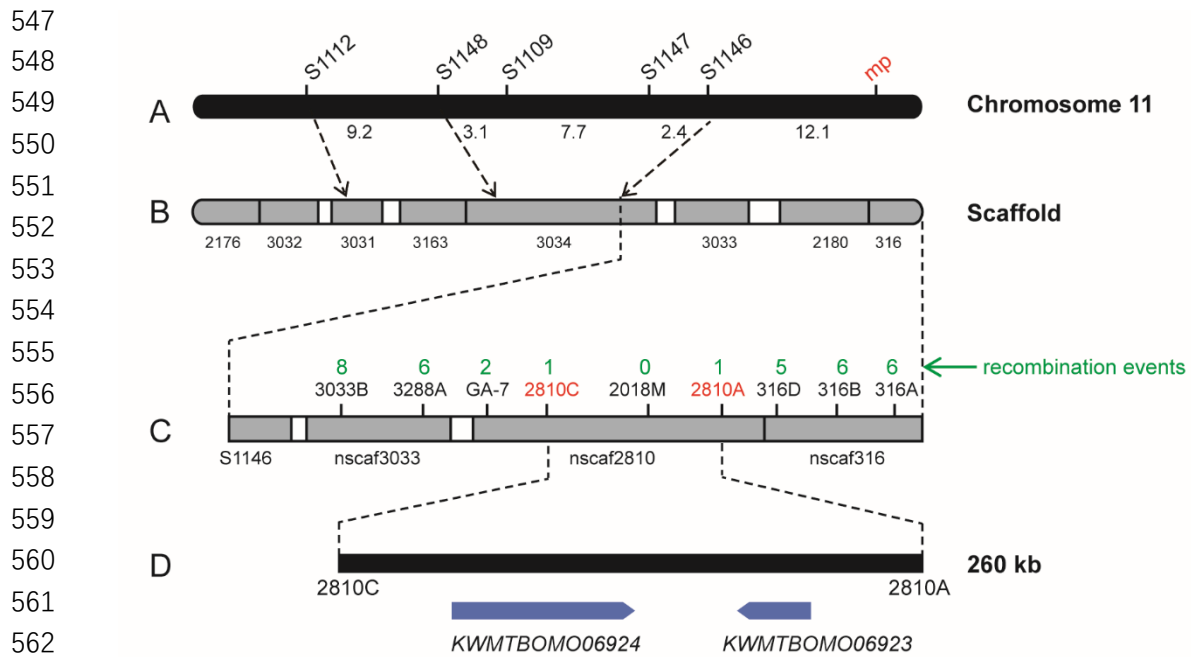

**Figure 2. Molecular mapping of candidate genes responsible for the *mp* phenotype**

(A) Map of *B. mori* chromosome 11 with locations of SSR markers used in this study.

Five SSR markers and the *mp* locus are labeled above the map. Map distances are

shown in cM. (B) Schematic of scaffolds on chromosome 11. Gray boxes represent the

assembled scaffolds; their respective serial numbers are shown below. S1112 mapped

to nscf3031, whereas S1148, S1109, S1147, and S1146 all mapped to nscf3034. (C)

Expanded view of genomic scaffolds used for fine mapping of the *mp* locus. Newly

designed primer sets are shown on the map, and the numbers above them indicate the

respective recombination events in 320 BC<sub>1</sub>M progeny. The *mp* locus was tightly linked

to 2810M, located between markers 2810A and 2810C. (D) Gene annotation in the *mp*

linked region. Two genes were predicted in this region, namely *KWMTBOMO06923*

and *KWMTBOMO06924*.

578

579 Three categories of alternative splicing isoforms in ZD

Three categories of alternative splicing isoforms in *mp*

580

581

582

583

584

585

586

587

588

589

590

591

592

593

594

595

596

597

598

599

600

601

602

603

604

605

606

607

608

609

610

611

612

613

614

615

616

617

618

619

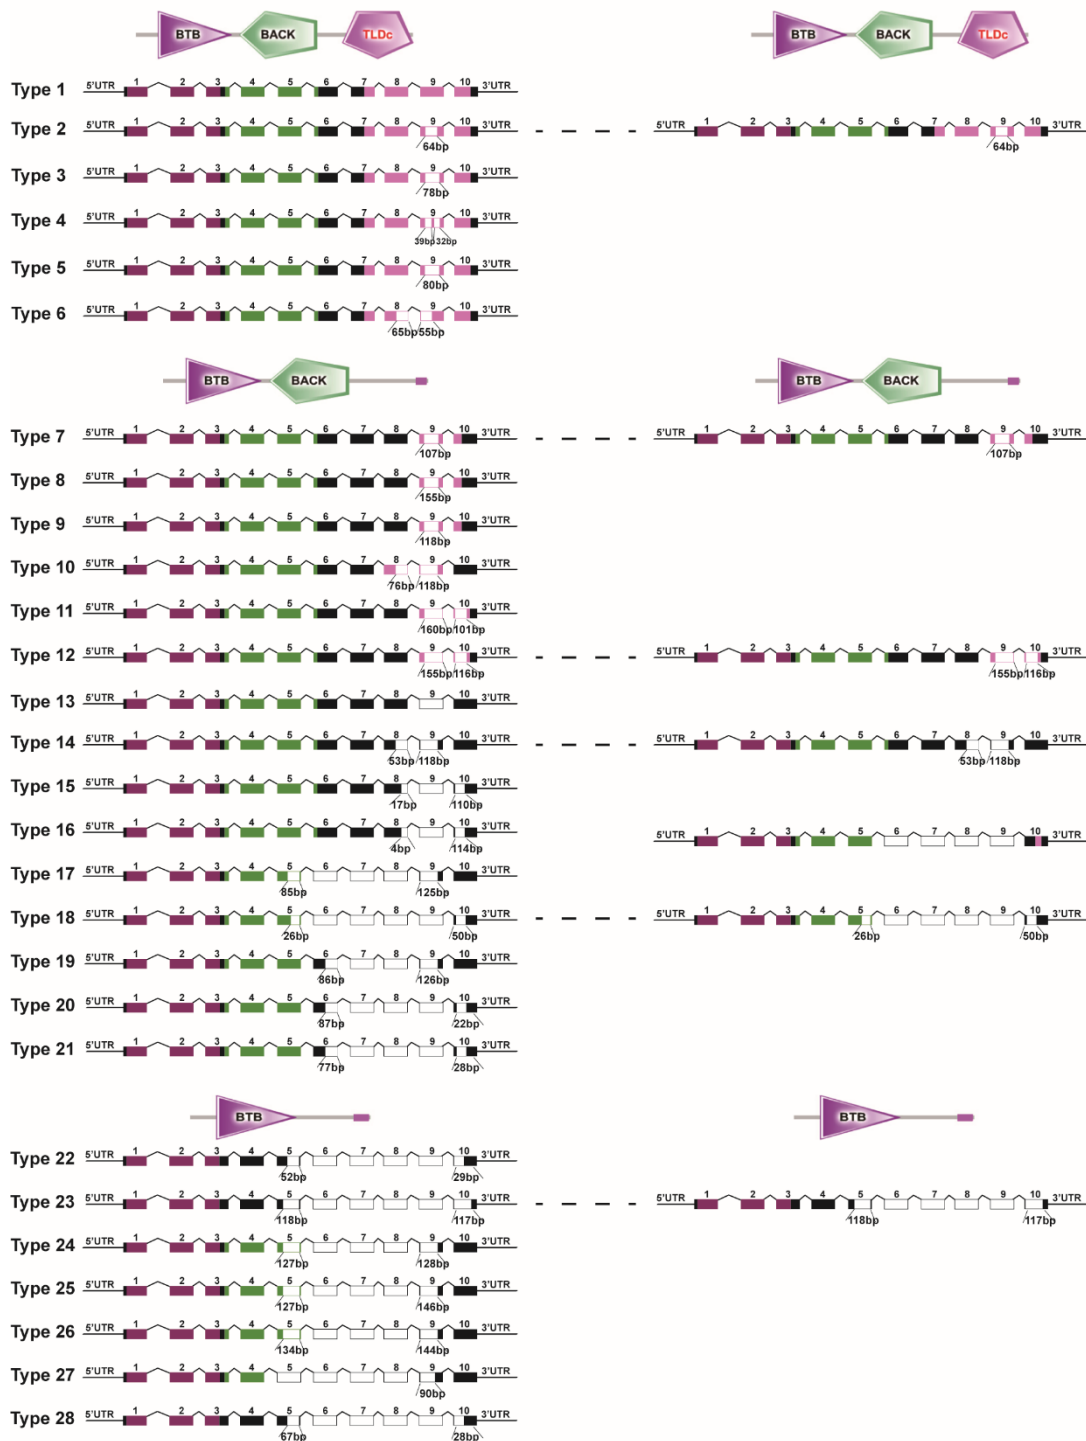

**Figure 3. Transcript isoforms in wing discs from *mp* and WT silkworms**

Twenty-eight distinct transcript isoforms were identified in wing discs from WT

silkworms. Six of the 28 transcript isoforms identified in WT silkworms were also

620 recovered in wing discs from *mp* silkworms, plus one unique isoform. Dotted lines  
621 indicate transcript isoforms identified in both WT and *mp* silkworms. Exon box colors  
622 correspond to the encoded domains indicated above each category. Unfilled regions  
623 represent exons and portions of exons not included in the specific mature mRNA  
624 transcript shown in the figure. Sizes (nucleotides) of truncated exons are shown below  
625 the truncations. *DZ*, *Dazao*, used as wildtype control; *mp*, silkworm *mp* mutant.  
626  
627  
628

629

630

631

632

633

634

635

636

637

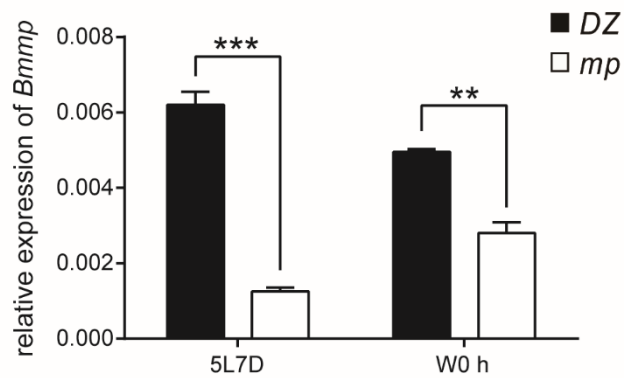

638 **Figure 4. Relative *Bmmp* mRNA levels in wing discs from WT and *mp* silkworms**

639 *Bmmp* mRNA levels in wing discs from WT and *mp* silkworms were quantified by qRT-

640 PCR. Relative *Bmmp* mRNA levels were significantly higher in WT silkworms

641 compared to *mp* silkworms at two different developmental stages (5L7D and W0 h).

642 5L7D, fifth instar at day 7; W0 h, wandering stage at 0 h; \*\*\*,  $P < 0.001$ ; \*\*,  $P < 0.01$ .

643 *DZ*, *Dazao*, used as wildtype control; *mp*, silkworm *mp* mutant. N=3 for both *Dazao*

644 and *mp* silkworms at 5L7D and W0 h, respectively. Values are relative to expression of

645 eukaryotic translation initiation factor 4A (defined as 1). Experiment was independently

646 repeated three times. Error bars represent SEM.

647

648

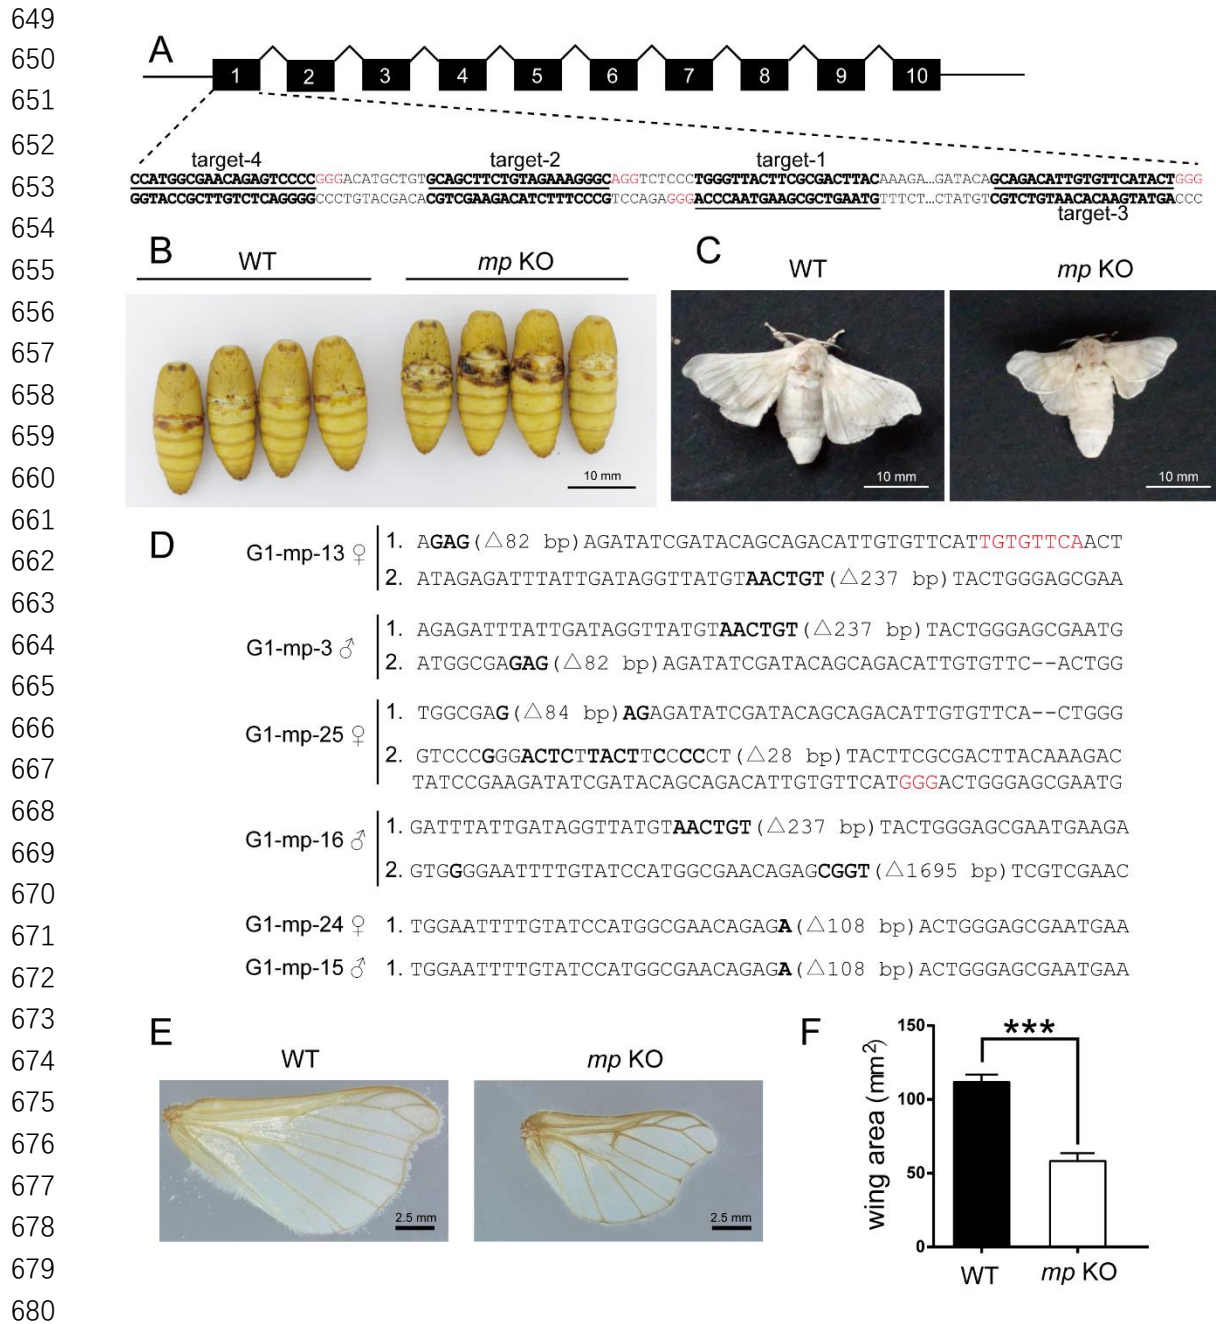

681 **Figure 5. Construction of *Bmmp* knockout and phenotypic characterization of**  
682 **mutants**

683 (A) Schematic of *Bmmp* gene structure and nucleotides targeted for mutagenesis by  
684 CRISPR/Cas9. Genomic targets (not including PAM) are shown in underlined text, and  
685 PAM sequences are shown in red. Black rectangles and broken lines represent exons  
686 and introns, respectively, and are not to scale. (B) *Bmmp* knockout mosaics (*mp* KO) in

687 the injected generation ( $G_0$ ) exhibited naked third abdominal segments in the pupal  
688 stage, suggestive of a changed wing phenotype. (C) *Bmmp* knockout mosaics (*mp* KO)  
689 in  $G_0$  exhibited significantly smaller wing areas by visual examination. Scale bar = 10  
690 mm. (D) Mutant alleles detected by sequencing in nine randomly selected  $G_1$  silkworms.  
691 Red, base insertion; bold, base substitution; small deletions are represented with dashes;  
692 for large deletions, the sizes of the deleted regions are shown in parentheses. (E)  
693 Representative photograph of wings of WT and homozygous or compound  
694 heterozygous *Bmmp* knockout silkworms. Note that scale hairs were removed from the  
695 wings to exhibit the wing shape characteristics more clearly. Scale bar = 2.5 mm (F)  
696 Measurement of total wing areas in WT and homozygous or compound heterozygous  
697 *Bmmp* knockout silkworms. N=23 for WT and N=45 for *Bmmp* knockouts. WT,  
698 wildtype control, *Dazao*; *mp* KO, homozygous or compound heterozygous *Bmmp*  
699 knockout silkworms. \*\*\*,  $P < 0.001$ .

700

701

702

703

704

705

706

707

708

709

710

711

712

713

714

715

716

717

718

719

720

721

722

723

724

725

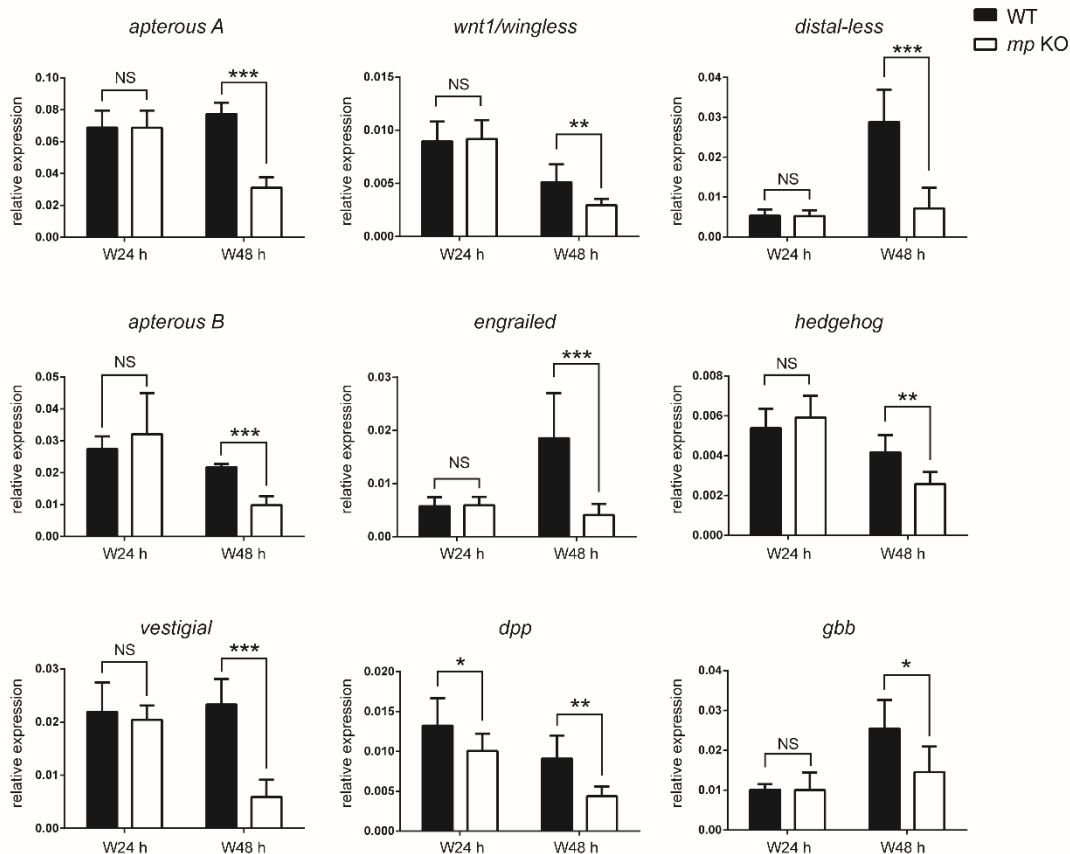

726 **Figure 6. Expression of key genes responsible for wing A-P and P-D axis**

727 **development in wandering stage silkworms**

728 mRNA levels for *engrailed*, *hedgehog*, *wnt1/wingless*, *dpp*, *gbb*, *apterous A*, *apterous*

729 *B*, *vestigial*, and *distal-less* were measured by qRT-PCR in wing discs from WT and *mp*

730 silkworms at 24 (W24 h) and 48 hours (W48 h) after initiation of the wandering stage.

731 NS, not significant; \*,  $P < 0.05$ ; \*\*,  $P < 0.01$ ; \*\*\*,  $P < 0.001$ ; N=5 or 6 for *Dazao* and

732 N=10 for *Bmmp* knockouts at 24 h; N=5 or 6 for *Dazao* and N=5 or 8 for *Bmmp*

733 knockouts at 48 h. Values are relative to expression of eukaryotic translation initiation

734 factor 4A (defined as 1). Experiments were independently repeated three times. WT,

735 wildtype control, *Dazao*. *mp* KO, *Bmmp* knockout homozygous or compound

736 heterozygous silkworms.



737

738

739

740

741

742

743

744

745

746

747

748

749

750

751

752

753

754

755

756

757

758

759

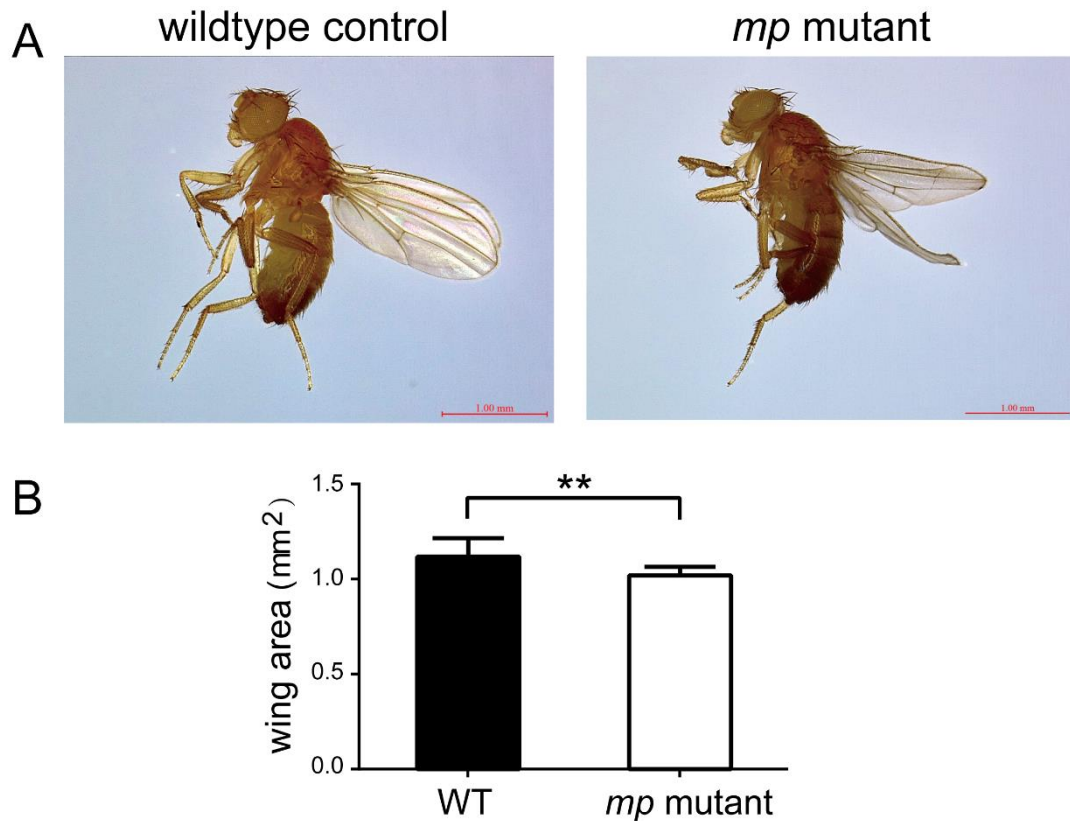

760 **Figure 7. Wing phenotype of the *Drosophila mp* mutant**

761 (A) The *Drosophila mp* mutant exhibited curly wings as compared with the WT control

762 (*yw*) by visual examination. Scale bar, 1 mm. (B) Mean total wing area measurements.

763 *Drosophila mp* mutants had significantly smaller wing areas compared with the WT

764 control (*yw*). \*,  $P < 0.01$ .  $N = 16$  for *yw* *Drosophila* and  $N = 13$  for *mp* mutants. *yw*

765 *Drosophila* and *mp* mutants were both male. Experiments were repeated three times

766 independently. Error bars represent SD.

767

768
